# Supplementary material for: Classification of red beet and sugar beet for drought tolerance using morpho-physiological and stomatal traits
Source: PeerJ. 2025 Mar 21;13:e19133. doi: 10.7717/peerj.19133 (PMC11932113; doi:10.7717/peerj.19133)
Supplement: Supplemental Information 2 [file peerj-13-19133-s002.xlsx]

## Sheet: Sayfa1
Replicate	Cultivars	Drought	Leaf temperature	SPAD	Leaf area	Fresh weight	Dry weight	Dry matter	RWC	MSI	Stomata density	Stomata size
1	Bicores	Control	22.8	42.4	239.434	12209	1	8.19068	80.7661	75.8085	114.458	469.182
2	Bicores	Control	22.6	42	228.725	12208	0.9	8.19135	85.2286	77.1384	126.506	458.565
3	Bicores	Control	23.3	45.8	227.458	11325	1062	9.6	81.7013	81	120.482	482.522
4	Bicores	Control	23.5	45.1	235.454	12802	0.953	8.39713	80.5749	81.9231	110.442	485.973
1	Bicores	10% PEG	23.8	37	102.003	4703	0.473	11.7159	77.3707	85.0183	128.514	420.43
2	Bicores	10% PEG	23.8	39	105	3663	0.419	13.2132	74.2	71.3359	124.498	411.658
3	Bicores	10% PEG	24	41.5	142.549	7602	0.719	11.5627	68.7452	70.2835	122.49	439.005
4	Bicores	10% PEG	23.9	41	131.228	7156	0.614	10.6205	76.4789	83.6217	118.474	424.894
1	Bicores	20% PEG	23.8	42	45	3.5	0.357	13.343	67.8436	67	199	362.172
2	Bicores	20% PEG	23.8	40.5	44.747	2831	0.267	12.3631	67.3913	65	200.803	357.289
3	Bicores	20% PEG	22.1	43.3	41.267	3150	0.323	12.127	66.5468	61	190.763	354.381
4	Bicores	20% PEG	22	39.9	48	3410	0.413	13.9589	62.8713	67.4969	198.795	346.814
1	BT Pancina	Control	22.5	39.1	244	13210	1046	8.97048	87	79	167	435.4
2	BT Pancina	Control	22.1	40.5	247.836	13521	0.801	6.77465	86.5445	80.0353	172.691	436.424
3	BT Pancina	Control	23.6	43.5	294.704	13930	0.976	7.77459	85.3953	79.7468	180.723	429.291
4	BT Pancina	Control	24	43	263.117	13	0.914	8.47819	85.443	79	160.643	450.856
1	BT Pancina	10% PEG	22.2	37	121	5118	0.596	13.6186	81.0056	86.3988	154.618	360.734
2	BT Pancina	10% PEG	22.8	39.4	121	4945	0.547	14.1596	80.6167	86	158.635	363.166
3	BT Pancina	10% PEG	22	41	170	5219	0.589	14.9115	78.3831	87.696	168.675	373.608
4	BT Pancina	10% PEG	21.3	38.8	172	5539	0.564	10.2	78.9544	84.5475	175	377.089
1	BT Pancina	20% PEG	22	34.7	56.591	2871	0.29	13.1313	77.673	80.7092	230.924	322.889
2	BT Pancina	20% PEG	23.5	34	54	2788	0.335	13.2712	71	78.735	220.884	325.624
3	BT Pancina	20% PEG	22.3	39.4	49.654	2922	0.298	12.5941	68.9759	81.828	218.876	332.58
4	BT Pancina	20% PEG	25.4	39	53	2.9	0.3	12.8974	68	78.4397	214.859	338.874
1	Yakut	Control	22.4	40.6	241.589	12536	1081	9.38098	81.7803	83.7251	150.602	405.809
2	Yakut	Control	21.9	43	207.717	12514	0.953	8.5744	84.8485	80.3468	148.594	388.154
3	Yakut	Control	21.7	42.3	219.145	11923	0.937	7.85	82	83	160.643	388.196
4	Yakut	Control	22.5	39.5	239.912	11623	0.894	8.44016	83.8946	80.7985	156.627	410.698
1	Yakut	10% PEG	24.5	38.6	63.781	3480	0.409	13.2184	76.3636	83.3898	230.924	361.029
2	Yakut	10% PEG	23.1	37.5	69.957	2913	0.326	13.6629	71.6783	76	218.876	352.321
3	Yakut	10% PEG	24.4	41.5	77.613	3545	0.423	13.4838	76.1905	83	232.932	373.262
4	Yakut	10% PEG	23.4	41.5	96.703	4461	0.516	13.2482	74.1538	81.4717	234.94	346.503
1	Yakut	20% PEG	24.3	40	65.812	3831	0.405	11.9029	69.9332	66	154.618	343.185
2	Yakut	20% PEG	24.2	42.6	68.396	4000	0.482	14	60.48	64.2119	170.683	360.462
3	Yakut	20% PEG	25.6	43.9	70	4869	0.332	14.1513	57.204	55.6078	160.643	367.024
4	Yakut	20% PEG	22.4	43	60	3522	0.398	13.0324	67.7996	66	162.651	358.02
1	Mohican	Control	22.1	40	249.31	12753	1416	12.3187	88.2992	88.1503	184.739	466.641
2	Mohican	Control	22.7	38.5	329.73	13523	1433	12.0166	87.4899	88.1443	188.755	435.769
3	Mohican	Control	23	42.2	312.54	13380	1492	12.4215	85.4082	88.4507	176.707	424.927
4	Mohican	Control	22.5	41.6	248.464	13235	1306	11.1371	85.3549	89.0625	158.635	418.642
1	Mohican	10% PEG	22.4	43	187.407	8787	0.995	12.7916	80.2978	84.0868	173.838	346.778
2	Mohican	10% PEG	21.6	40	164	8.4	0.954	12.72	80.5128	85.1964	172.117	361.635
3	Mohican	10% PEG	22.2	42.7	137.697	7	0.89	14.5627	84.202	88	166.667	387.887
4	Mohican	10% PEG	21	43.6	166.689	9	0.978	11.4211	85.7516	87.0445	172.691	368.056
1	Mohican	20% PEG	21.2	43	48.164	3576	0.403	13.0872	71.215	77.5	251.004	334.034
2	Mohican	20% PEG	22.5	42.3	55.168	3953	0.453	13.2811	64.5756	77.1429	232.932	359.488
3	Mohican	20% PEG	23.3	42.3	51.902	3152	0.343	12.9124	69.9099	77.8302	242.972	325.221
4	Mohican	20% PEG	24.8	40.6	59.494	4	0.492	12.8	67.1672	74.9489	240.964	339.908
1	Orthega KWS	Control	22.5	47.1	221.931	12065	1327	12.3332	77.7168	88.9518	259.036	371.284
2	Orthega KWS	Control	21.6	51.6	236.193	11302	1298	12.5641	80.0265	89	265.06	358.6
3	Orthega KWS	Control	22	46.7	246.226	12454	1136	10.6873	77.8428	85.7143	259.036	351.573
4	Orthega KWS	Control	22.6	44	247.309	12776	1389	12.3356	81.5328	88.6057	257.028	341.481
1	Orthega KWS	10% PEG	22	50	119.031	8417	0.796	10.6332	71.625	81.3627	222.892	348.461
2	Orthega KWS	10% PEG	22.6	52.1	122.24	8013	0.859	11.5687	66.7269	86	230.924	312.875
3	Orthega KWS	10% PEG	24.7	48.3	123.206	8693	0.805	10.0196	70.7635	86.0691	236.948	293.557
4	Orthega KWS	10% PEG	24.1	50	111	8	0.81	11	68.3239	82.016	234.94	334.573
1	Orthega KWS	20% PEG	22	43.8	65.398	3543	0.415	13.9148	61.7211	67.8711	160.643	445
2	Orthega KWS	20% PEG	22.8	45	60	3.5	0.37	13.4608	65	68	159	429.237
3	Orthega KWS	20% PEG	23.8	50	55	3618	0.375	12	65.1852	74	163	418
4	Orthega KWS	20% PEG	22.6	50.5	62.624	4024	0.444	12.5497	65.1639	73.6047	170.683	415.715
1	Valentina	Control	21.5	45.4	244.171	12258	1026	9.35715	85.291	83.9662	164.659	413.884
2	Valentina	Control	22	47	272.993	13018	1343	11.5763	78.3894	88.2726	156.627	420.642
3	Valentina	Control	21.9	42.8	258	12384	1079	9.97255	85.231	84.505	164.659	416.399
4	Valentina	Control	23.1	42.4	258.493	12604	1264	11.179	78.7848	87	160.643	448.339
1	Valentina	10% PEG	22	46.1	140.482	8	0.7	10	75	75	230.924	316.015
2	Valentina	10% PEG	22.6	46.1	164.369	7740	0.733	10.8527	74.0181	73.5484	214.859	314.444
3	Valentina	10% PEG	23.6	49.7	177.792	9479	0.873	10.8134	74.8945	74.1176	222.892	336.844
4	Valentina	10% PEG	21.6	43.2	123.759	8358	0.713	10.0383	76.4706	78.7618	218.876	344.665
1	Valentina	20% PEG	23.7	38.6	55	4	0.441	13	60.6775	71	196.787	311.01
2	Valentina	20% PEG	25	39.3	52.18	3713	0.409	13.0622	59.2126	73.7772	222.892	321.343
3	Valentina	20% PEG	24.7	40.9	54.301	3877	0.385	11.0137	61.5658	74	210.843	310.748
4	Valentina	20% PEG	24.5	36.7	50	3476	0.38	11.1623	62	75	196.787	310.705
